# Supplementary material for: Coordinated inhibition of C/EBP by Tribbles in multiple tissues is essential for Caenorhabditis elegans development
Source: PubMed Central journal article supplement (PMC5141650; doi:10.1186/s12915-016-0320-z), 2016-12-07
Supplement: 12915_2016_320_MOESM1_ESM.pdf [file 12915_2016_320_MOESM1_ESM.pdf]

**Figure S1**

**a** *C. elegans* head region

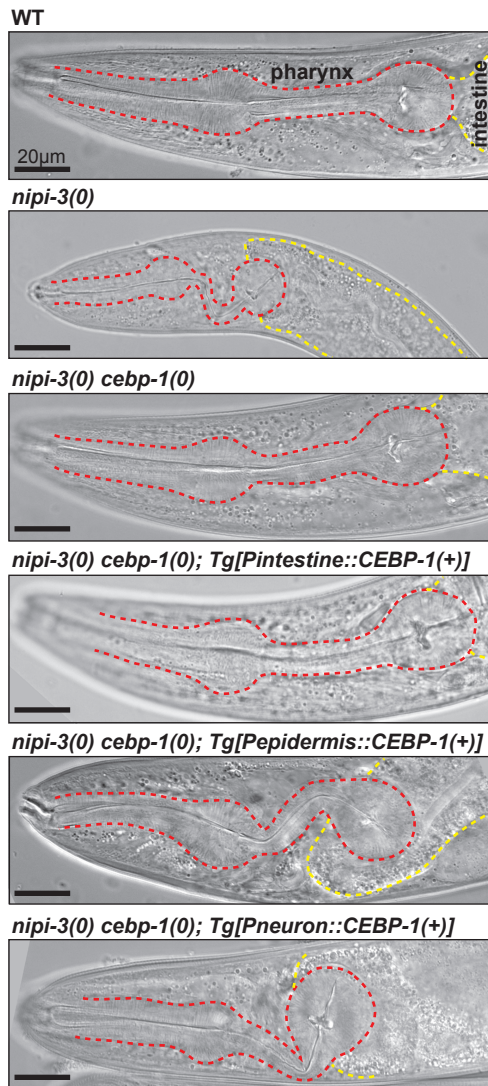

**b**

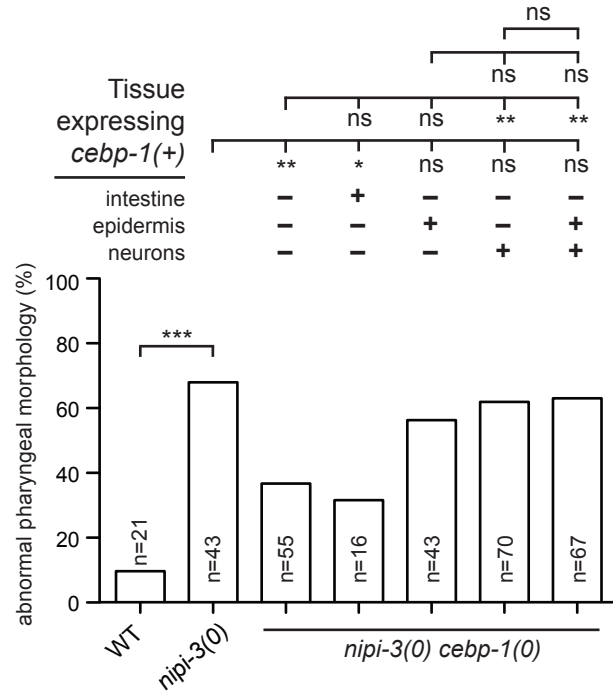

| Tissue expressing <i>cebp-1(+)</i> | intestine | epidermis | neurons | ns | ns | ns | ns | ns |
|------------------------------------|-----------|-----------|---------|----|----|----|----|----|
| intestine                          | -         | -         | -       | ** | *  | ns | ns | ** |
| epidermis                          | -         | -         | +       | ns | ns | ns | ** | ns |
| neurons                            | -         | -         | -       | ns | ns | ns | ** | ns |
