# Supplementary material for: Coordinated inhibition of C/EBP by Tribbles in multiple tissues is essential for Caenorhabditis elegans development
Source: PubMed Central journal article supplement (PMC5141650; doi:10.1186/s12915-016-0320-z), 2016-12-07

Figure S7

a

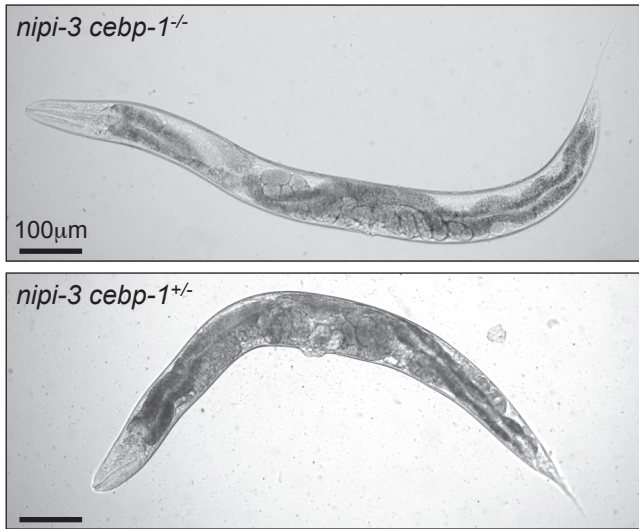

(3 days post-hatching)

b

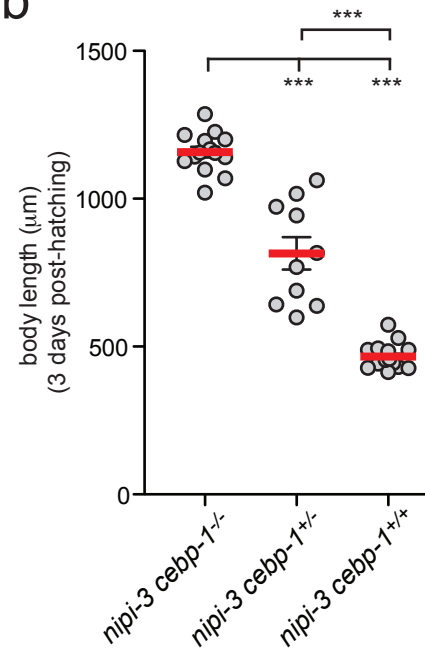

Supplement: 12915_2016_320_MOESM7_ESM.pdf [file 12915_2016_320_MOESM7_ESM.pdf]
